# Supplementary material for: A Kinetic Approach of DPPH Free Radical Assay of Ferulate-Based Protic Ionic Liquids (PILs)
Source: MDPI journal article supplement (doi:10.3390/molecules23123201), 2018-12-05
Supplement: s1 [file s1]

Figure S1

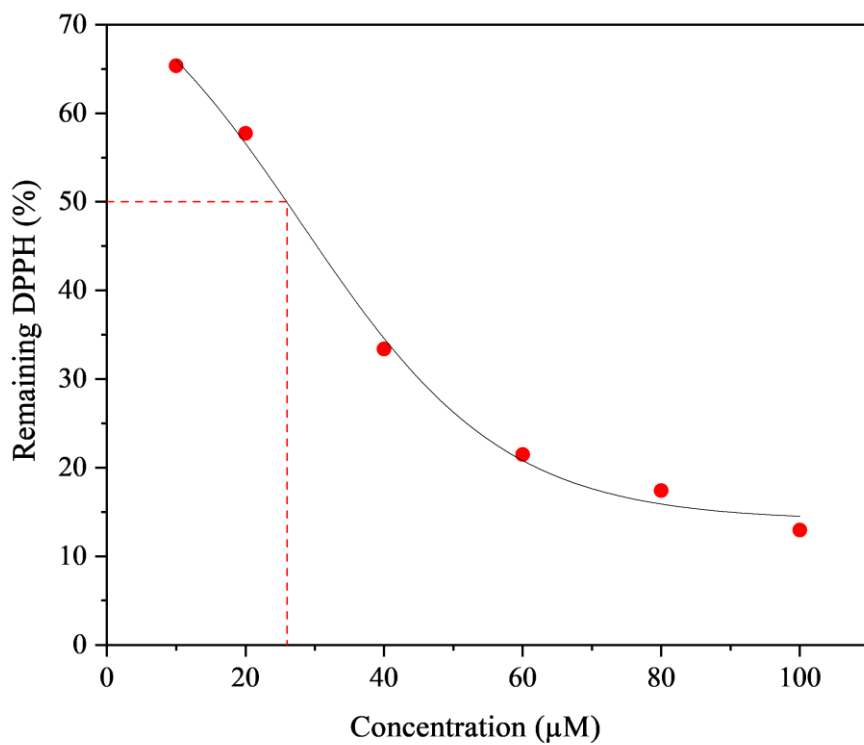

1

Figure S2

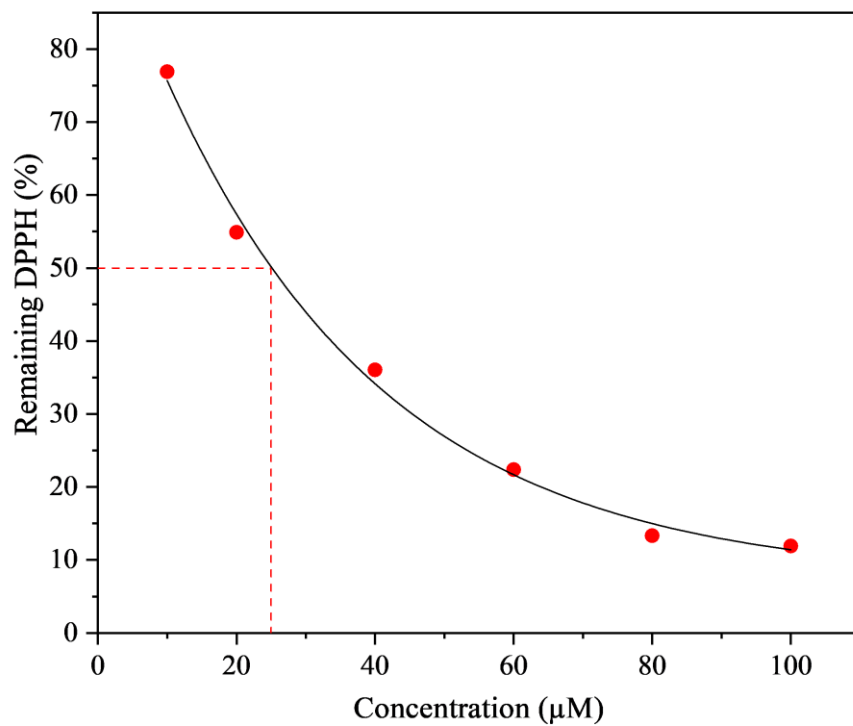

2

Figure S3

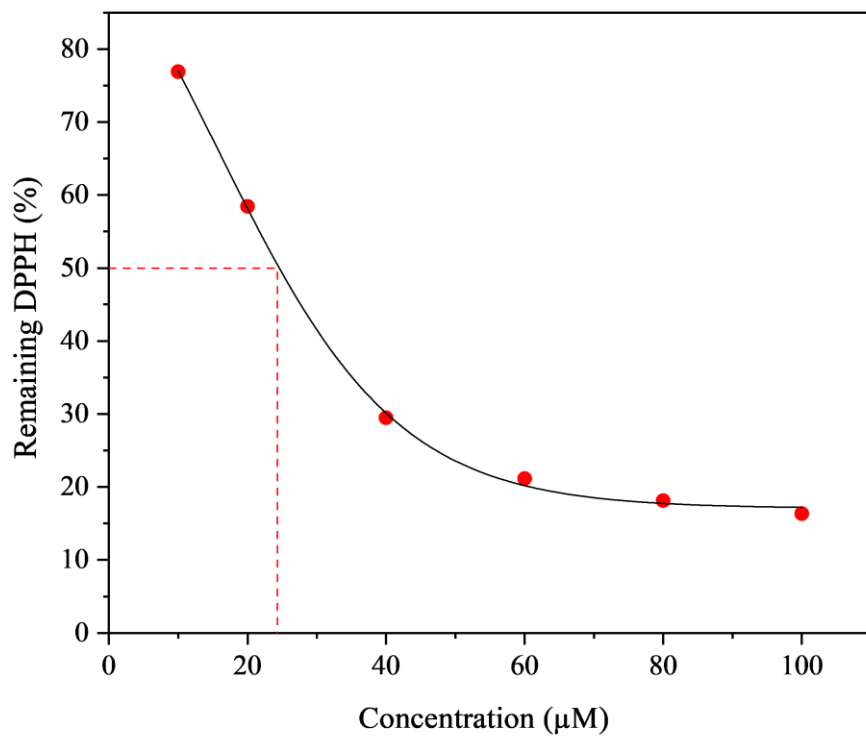

1

Figure S4

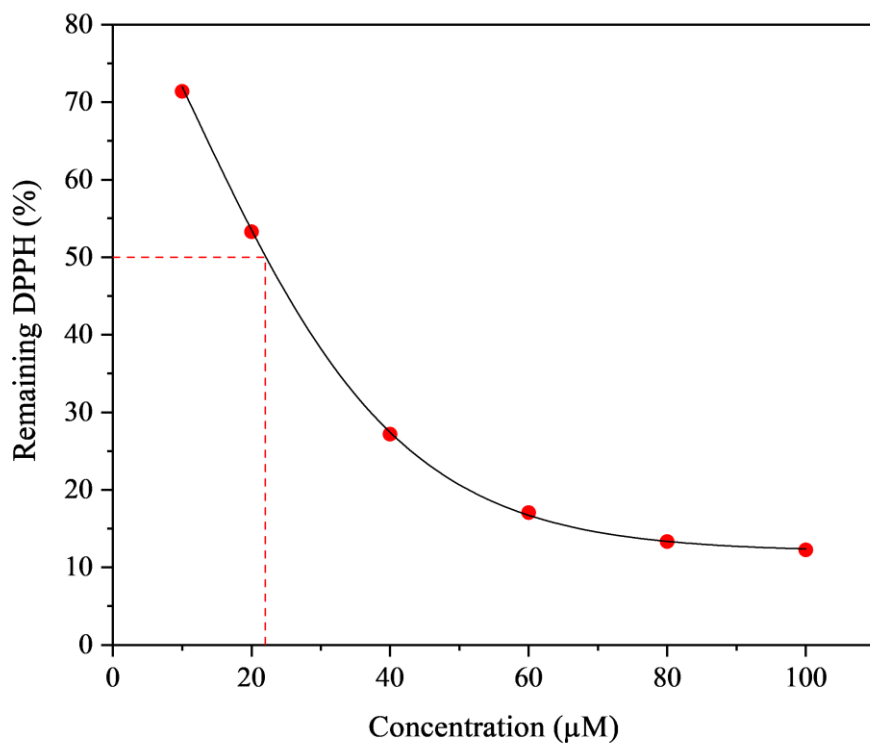

2

Figure S5

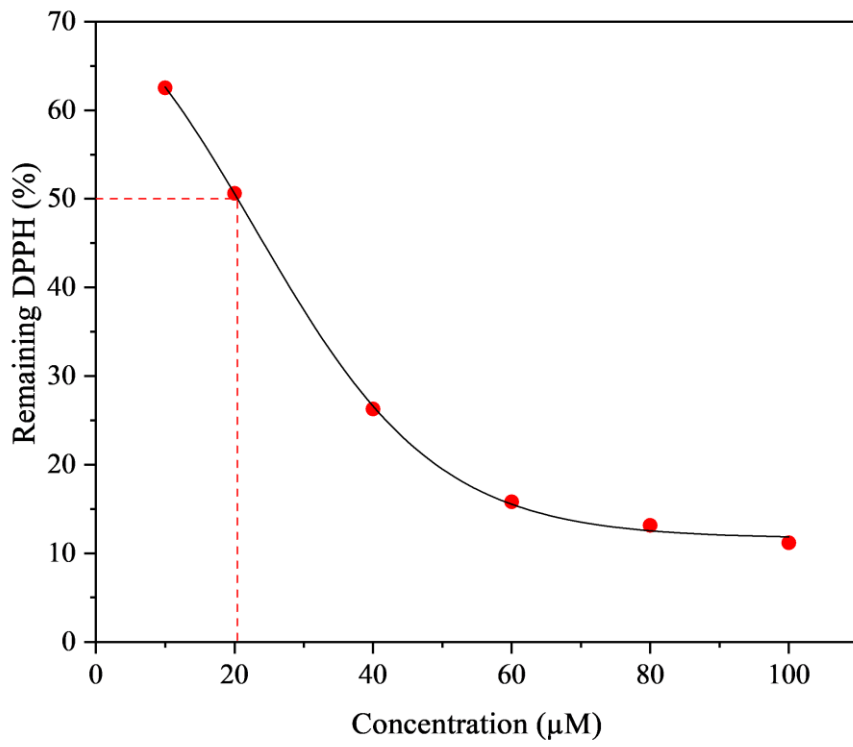

2

Figure S6

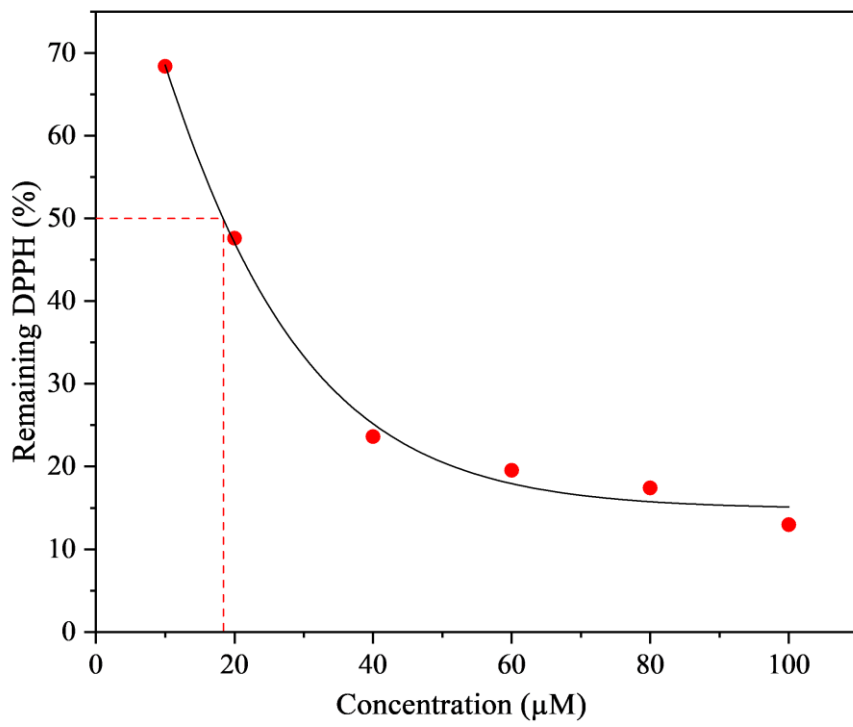

2

Figure S7

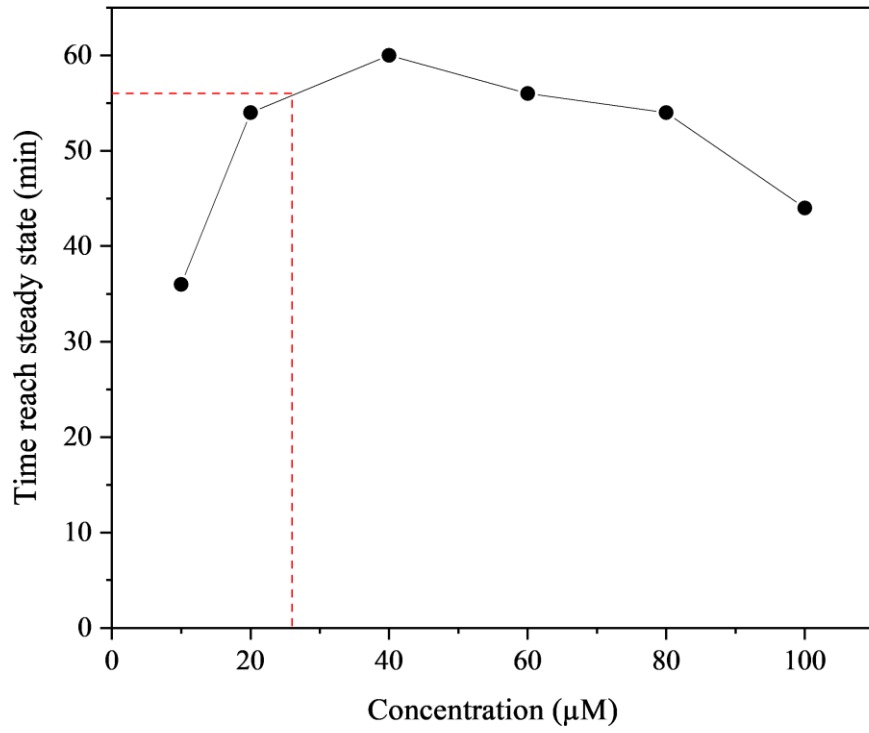

2

Figure S8

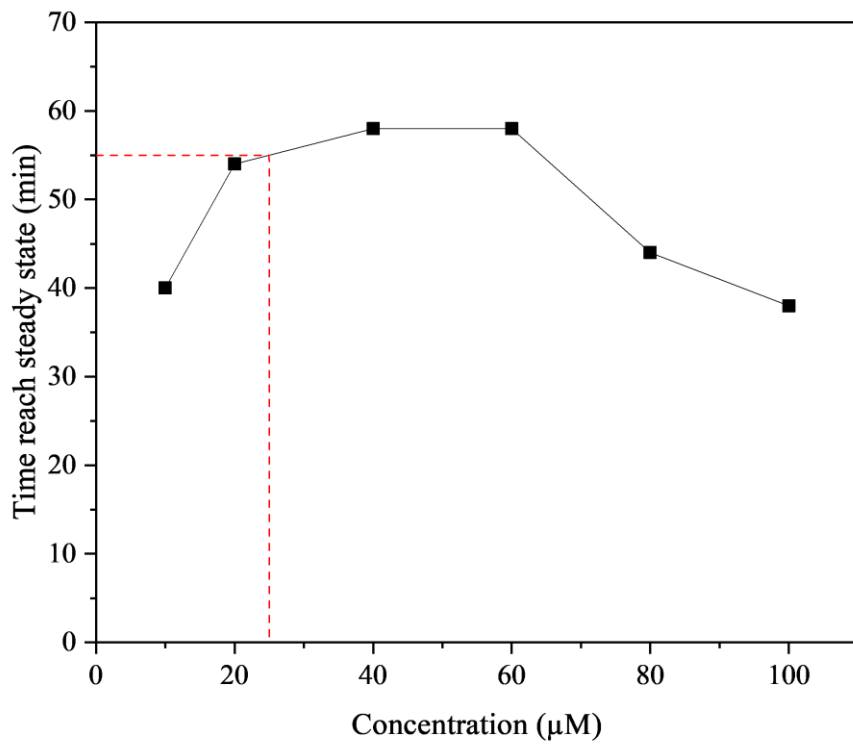

1

Figure S9

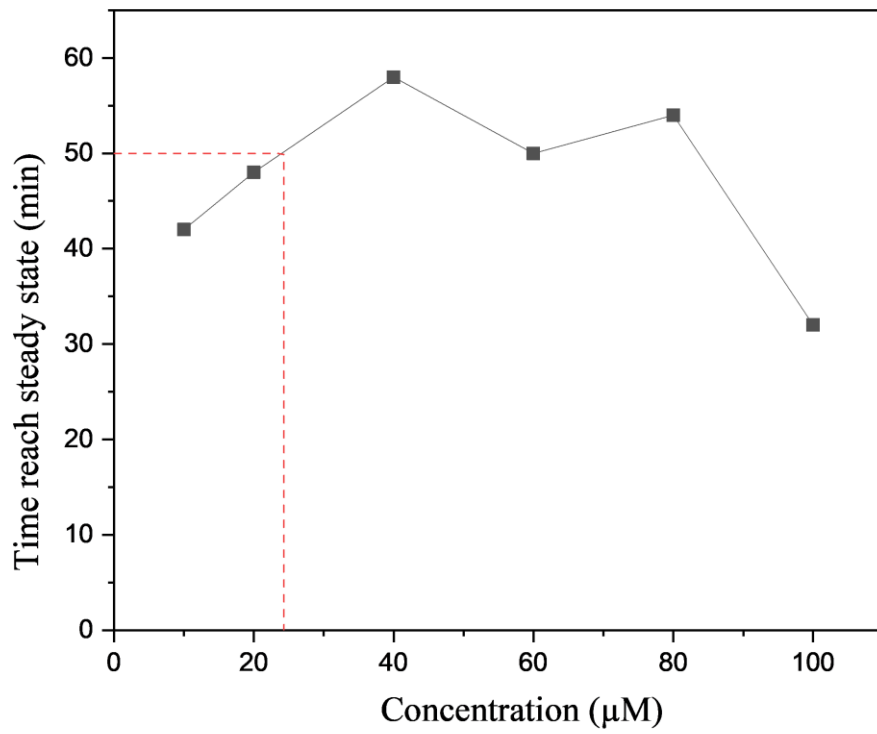

3

Figure S10

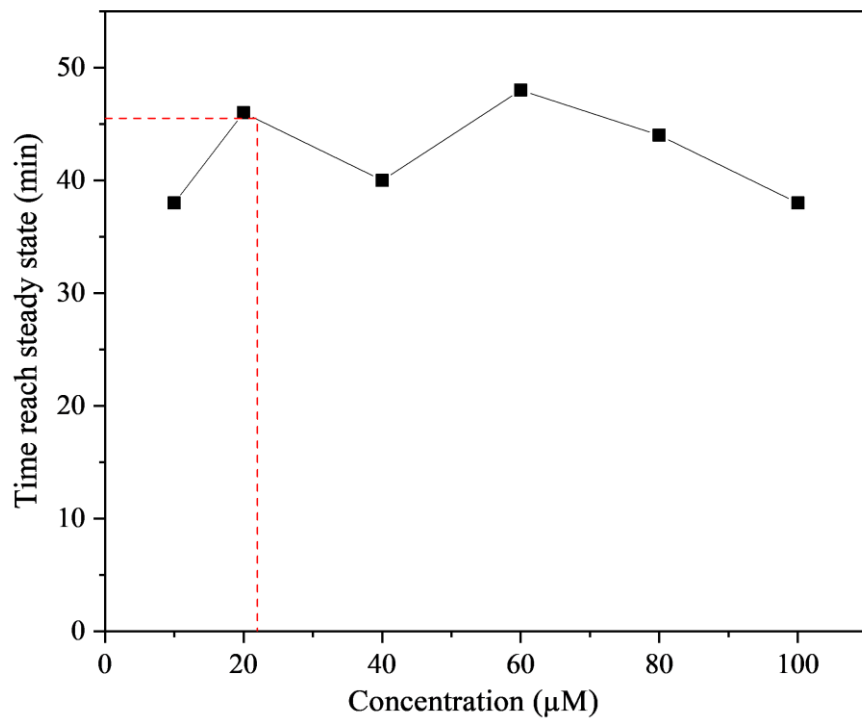

1

Figure S11

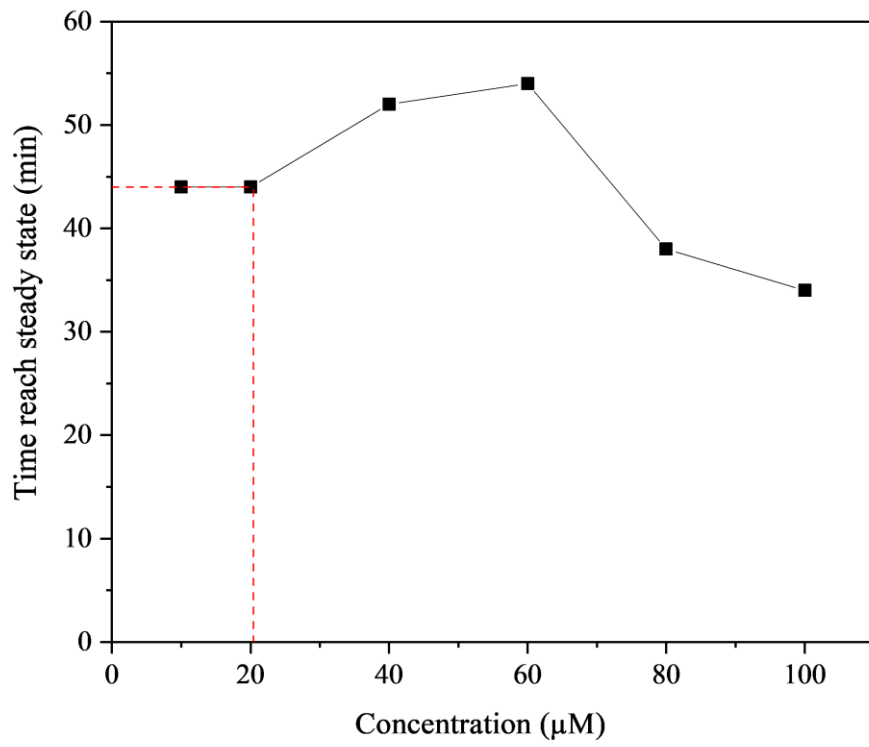

1

Figure S12

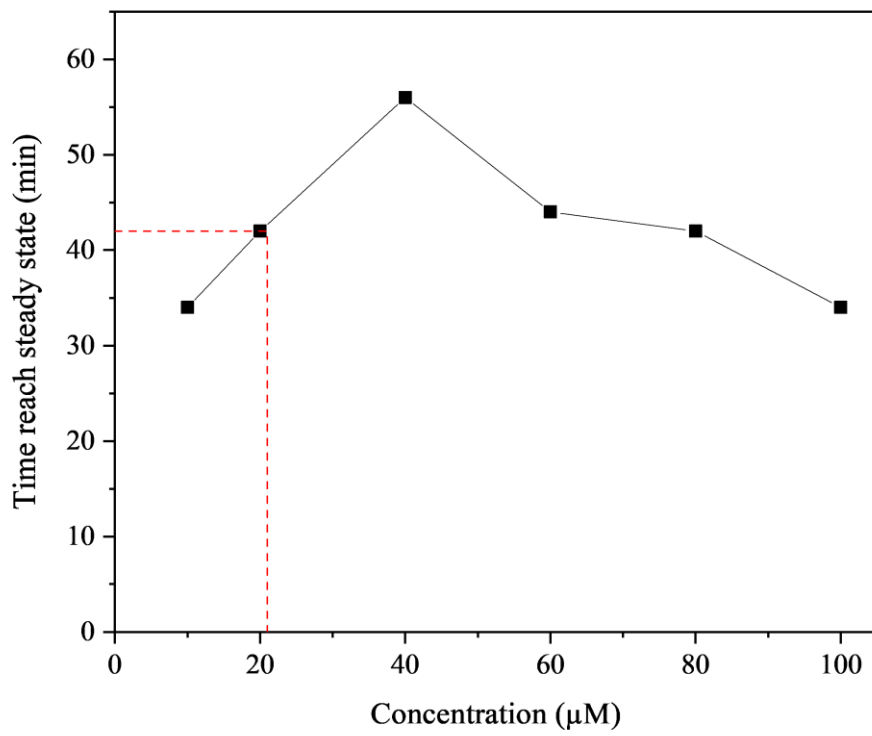

1
